# Supplementary material
Source: PubMed Central journal article supplement (PMC9868089)

**Extended Data Fig 1f**

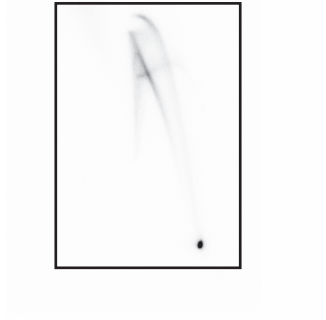

**Extended Data Fig 1h**

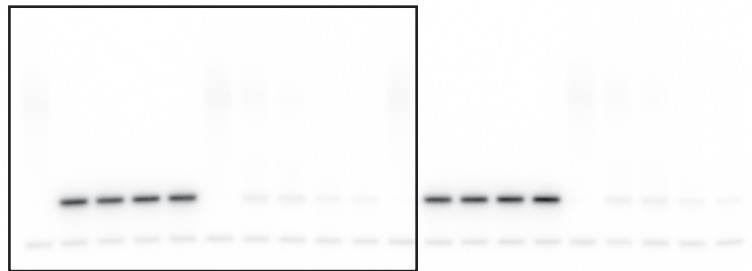

# Extended Data Fig 1I

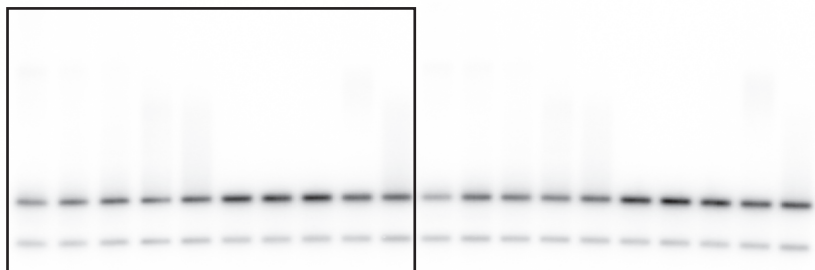

Supplement: NIHMS1848970-supplement-1848970_SD_ED_Fig_1_unprocessed_gels.pdf [file NIHMS1848970-supplement-1848970_SD_ED_Fig_1_unprocessed_gels.pdf]

**Extended Data Fig 2b**

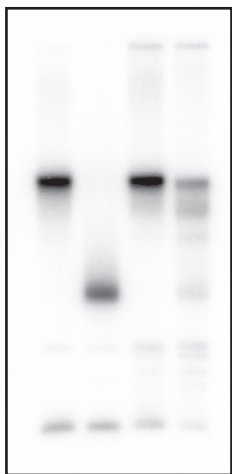

**Extended Data Fig 2f**

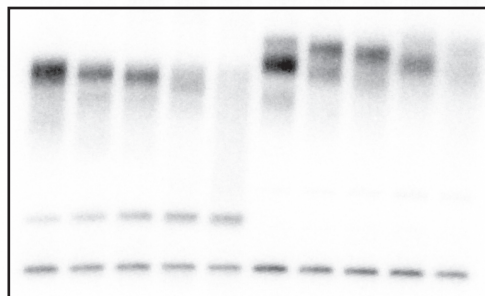

Supplement: NIHMS1848970-supplement-1848970_SD_ED_Fig_2_unprocessed_gels.pdf [file NIHMS1848970-supplement-1848970_SD_ED_Fig_2_unprocessed_gels.pdf]

**Extended Data Fig 3D**

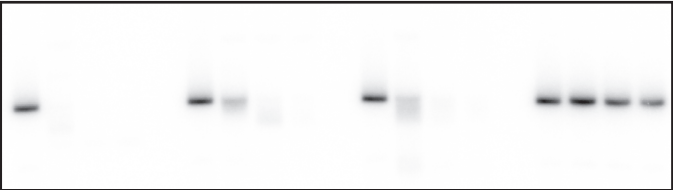

# Extended Data Fig 3D

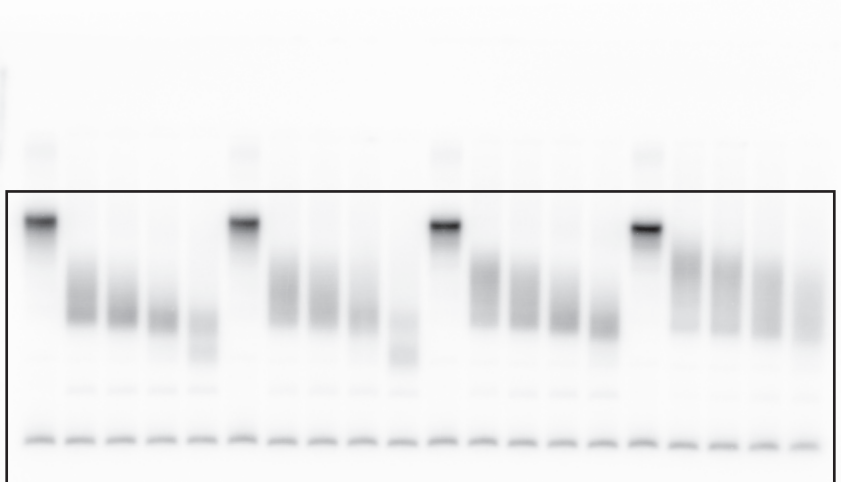

Supplement: NIHMS1848970-supplement-1848970_SD_ED_Fig_3_unprocessed_gels.pdf [file NIHMS1848970-supplement-1848970_SD_ED_Fig_3_unprocessed_gels.pdf]

# Extended Data Fig 4B

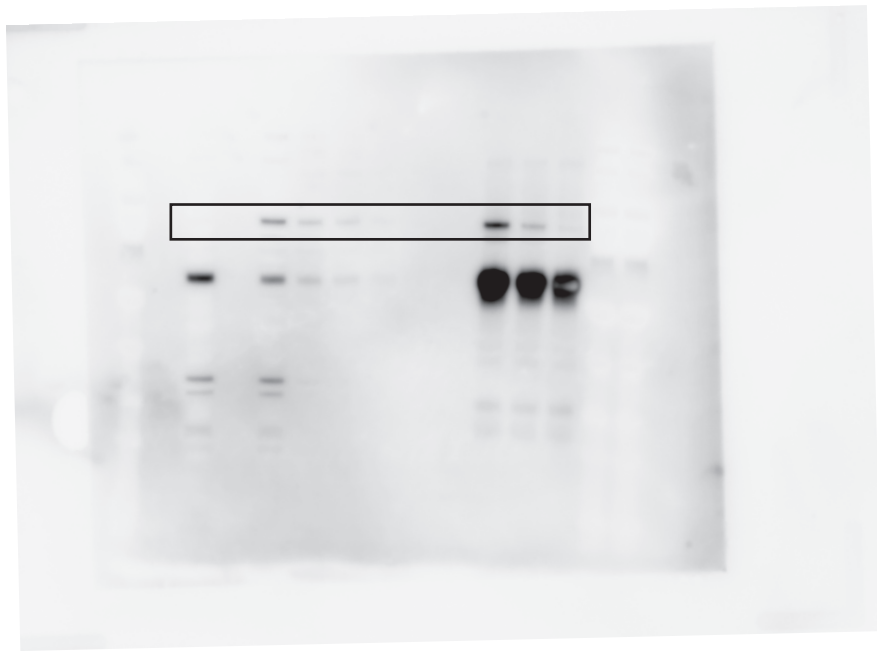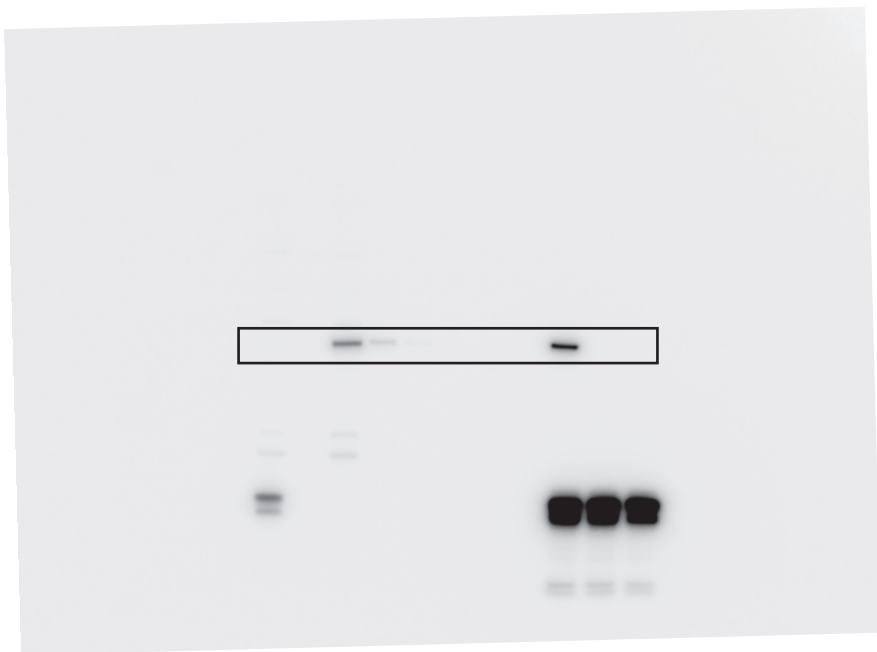

# Extended Data Fig 4C

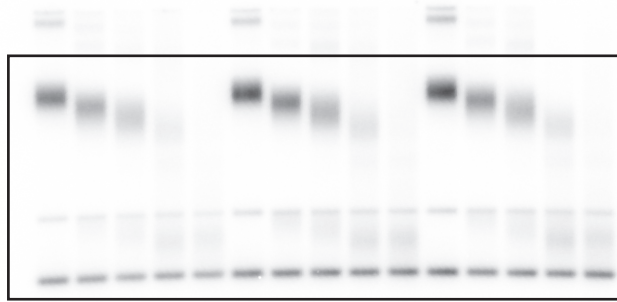

Supplement: NIHMS1848970-supplement-1848970_SD_ED_Fig_4_unprocessed_gels.pdf [file NIHMS1848970-supplement-1848970_SD_ED_Fig_4_unprocessed_gels.pdf]

**Extended Data Fig 5E**

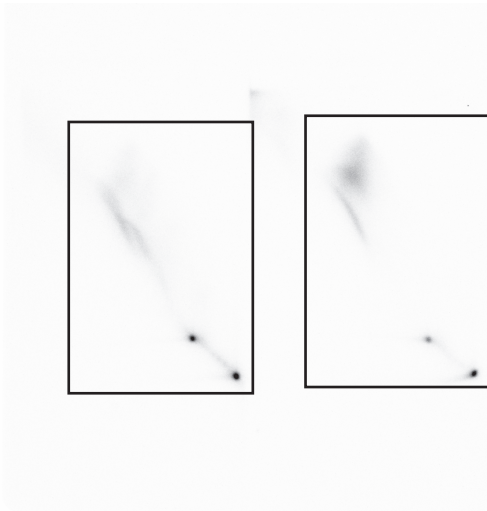

**Extended Data Fig 5L**

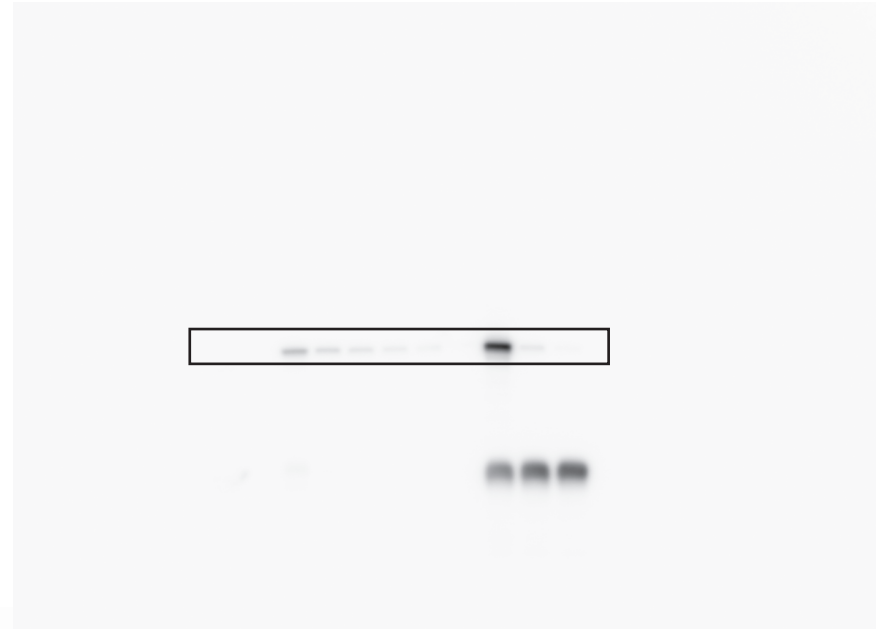

**Extended Data Fig 5M**

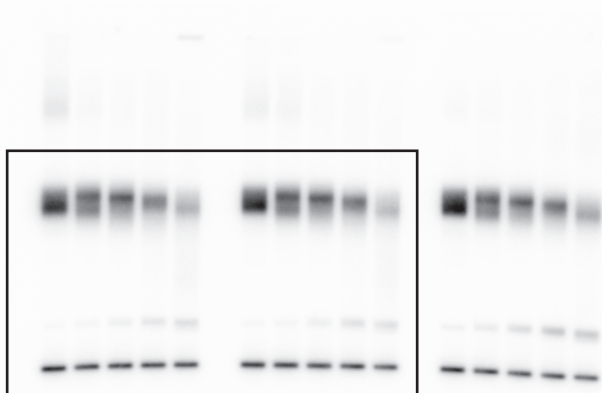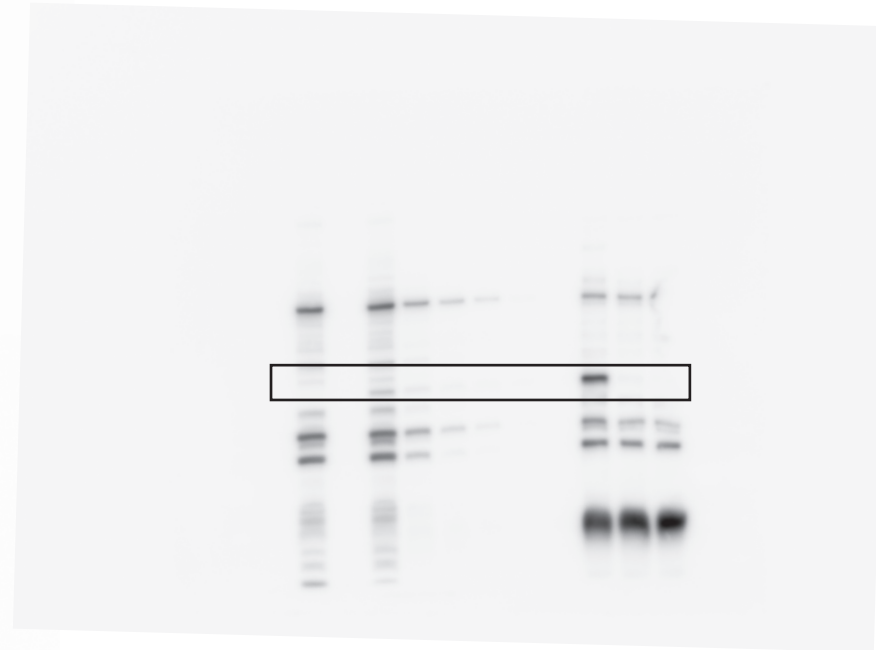

Supplement: NIHMS1848970-supplement-1848970_SD_ED_Fig_5_unprocessed_gels.pdf [file NIHMS1848970-supplement-1848970_SD_ED_Fig_5_unprocessed_gels.pdf]

# Extended Data Fig 6b

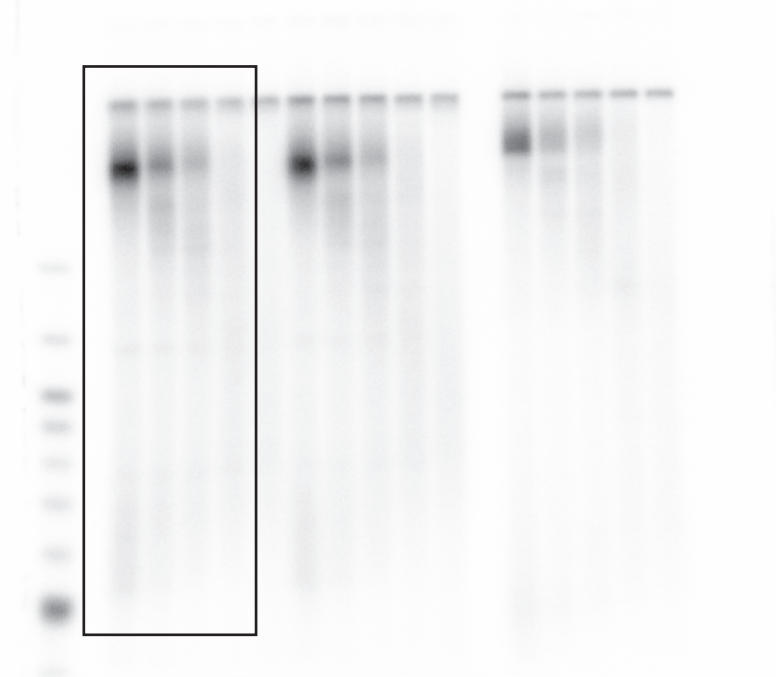

# Extended Data Fig 6f

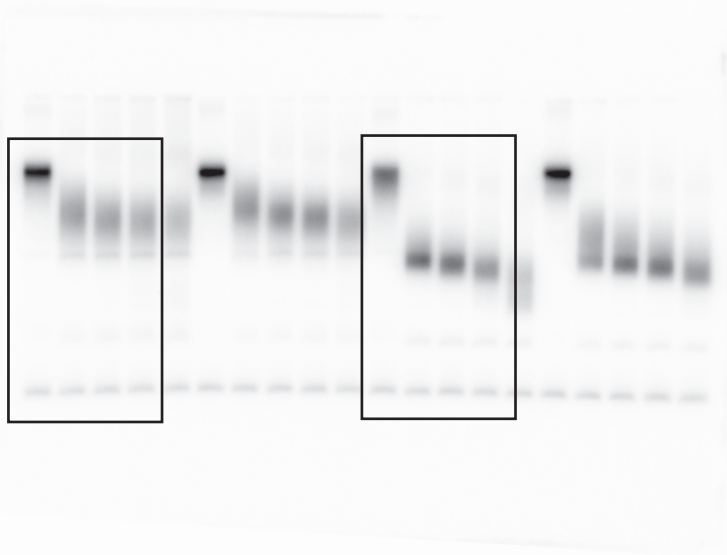

# Extended Data Fig 6h

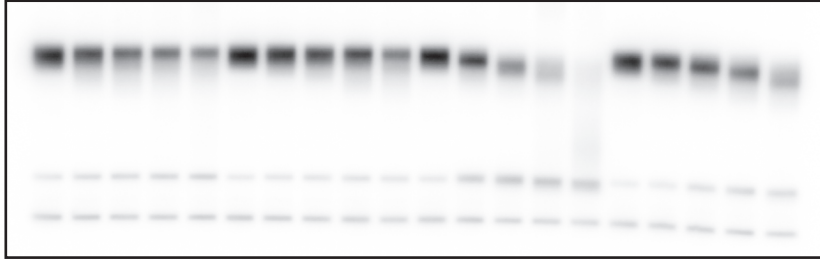

Supplement: NIHMS1848970-supplement-1848970_SD_ED_Fig_6_unprocessed_gels.pdf [file NIHMS1848970-supplement-1848970_SD_ED_Fig_6_unprocessed_gels.pdf]

# Extended Data Fig 7D

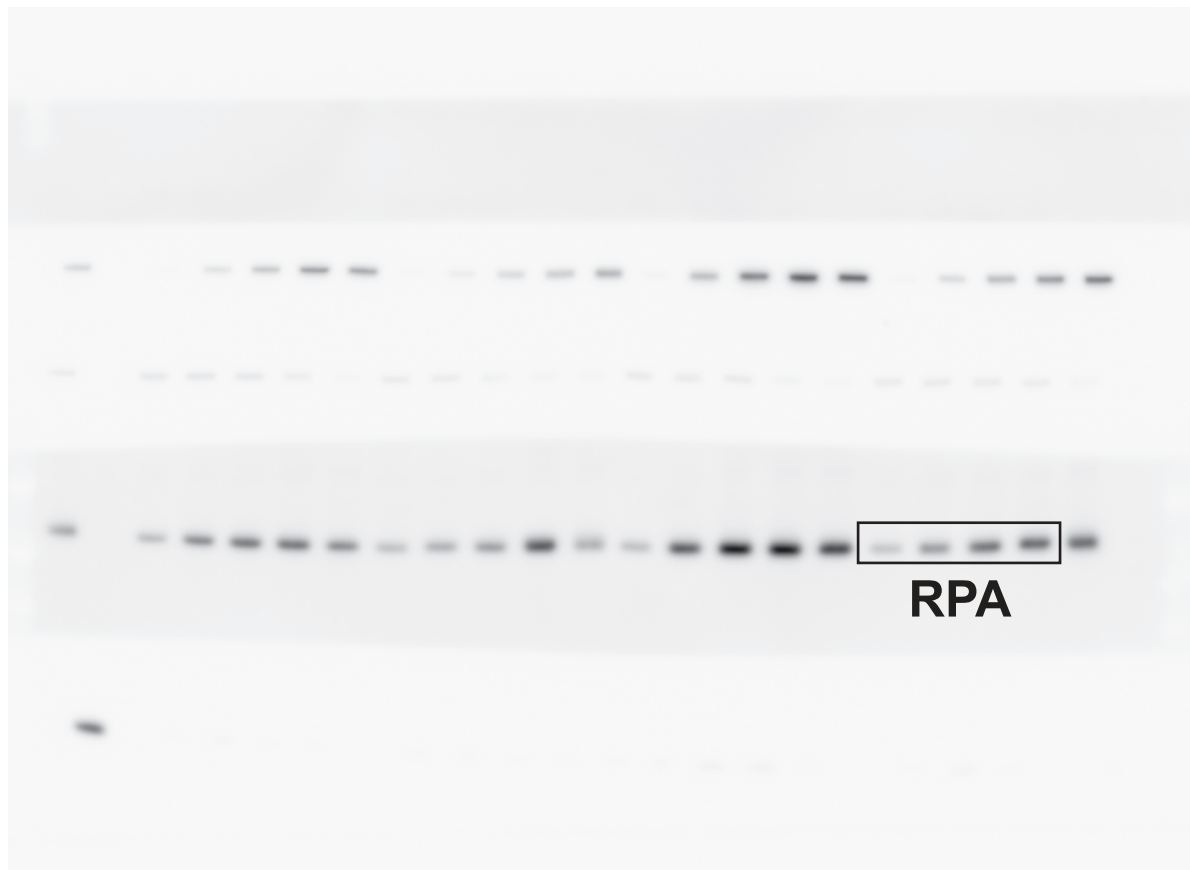

Supplement: NIHMS1848970-supplement-1848970_SD_ED_Fig_7_unprocessed_gels.pdf [file NIHMS1848970-supplement-1848970_SD_ED_Fig_7_unprocessed_gels.pdf]

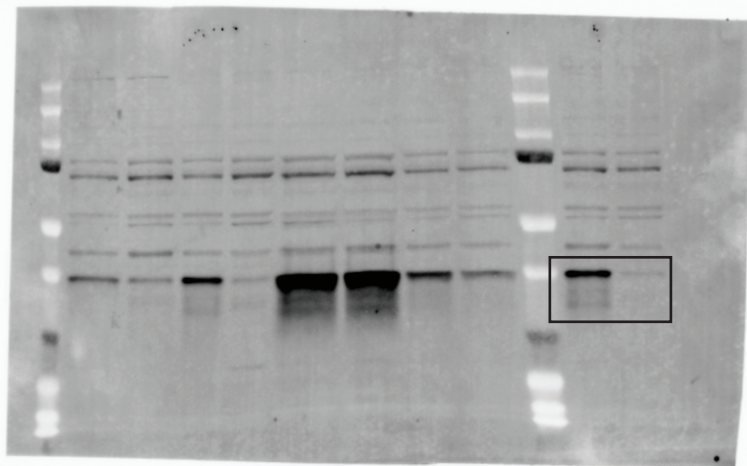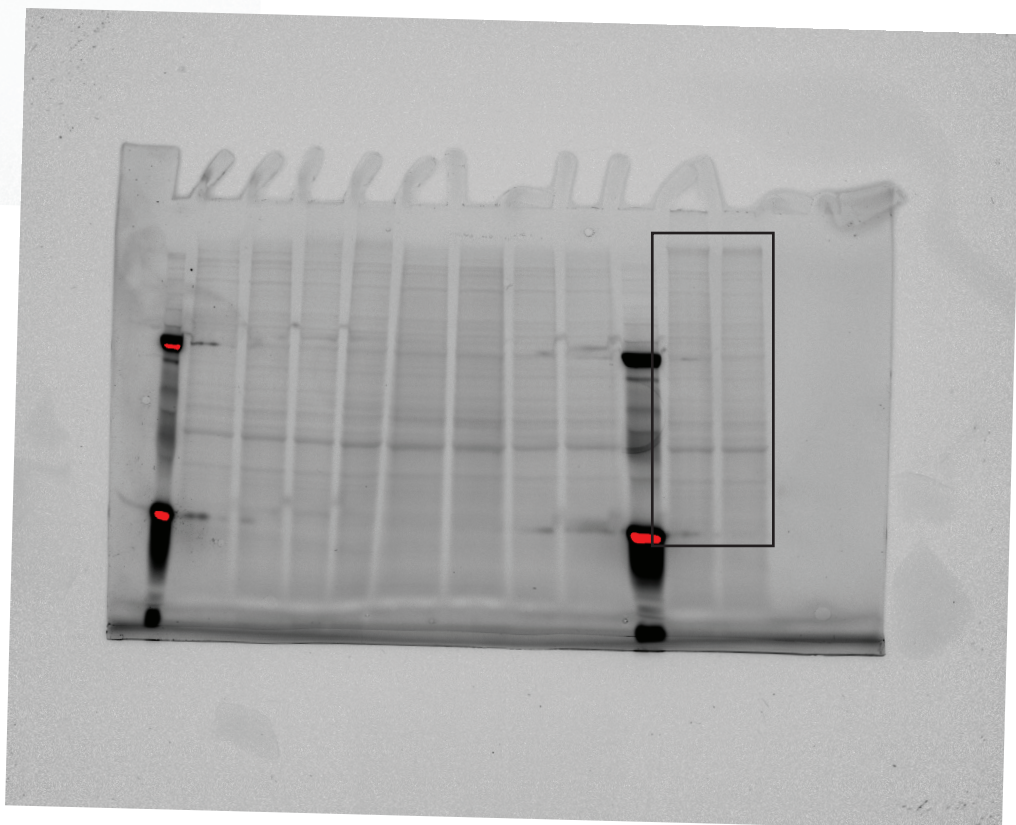

Supplement: NIHMS1848970-supplement-1848970_SD_ED_Fig_8_unprocessed_gels.pdf [file NIHMS1848970-supplement-1848970_SD_ED_Fig_8_unprocessed_gels.pdf]

**Figure 1b**

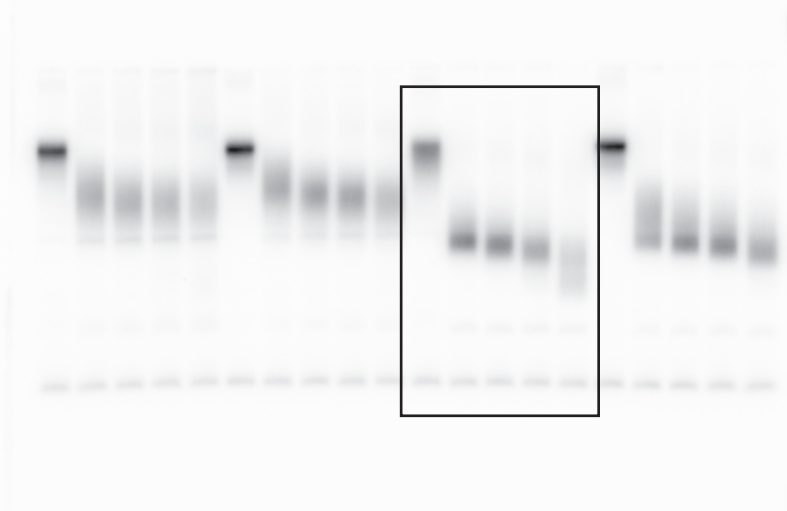

**Figure 1e**

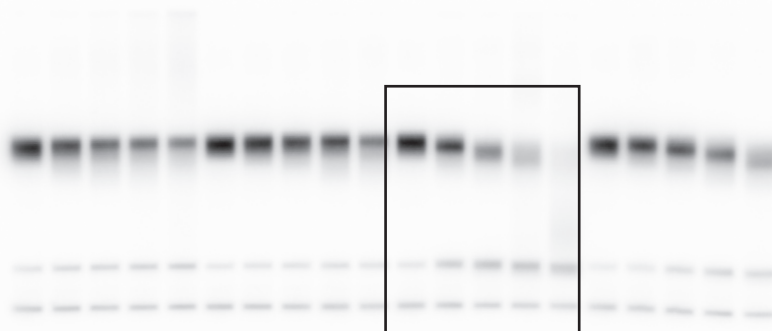

Supplement: NIHMS1848970-supplement-1848970_SD_Fig_1_unprocessed_gels.pdf [file NIHMS1848970-supplement-1848970_SD_Fig_1_unprocessed_gels.pdf]

**Figure 2b**

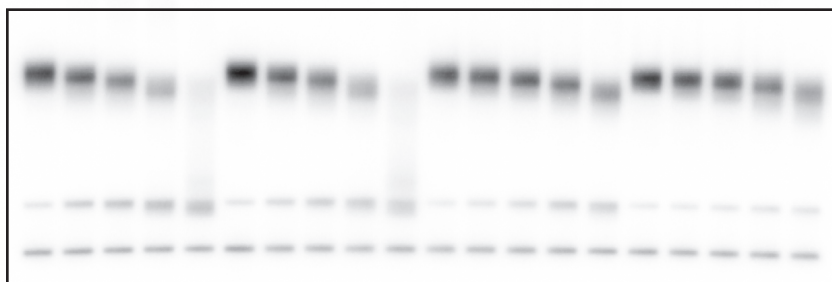

Supplement: NIHMS1848970-supplement-1848970_SD_Fig_2_unprocessed_gels.pdf [file NIHMS1848970-supplement-1848970_SD_Fig_2_unprocessed_gels.pdf]

**Figure 3c**

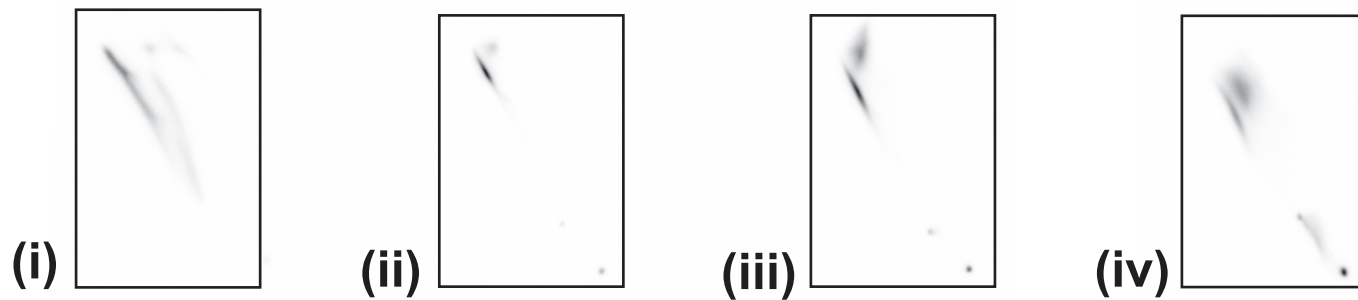

**Figure 3g**

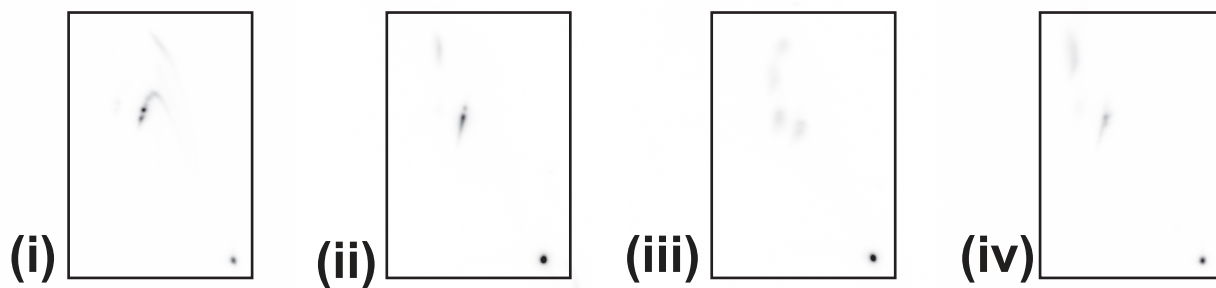

Supplement: NIHMS1848970-supplement-1848970_SD_Fig_3_unprocessed_gels.pdf [file NIHMS1848970-supplement-1848970_SD_Fig_3_unprocessed_gels.pdf]

**Figure 4b**

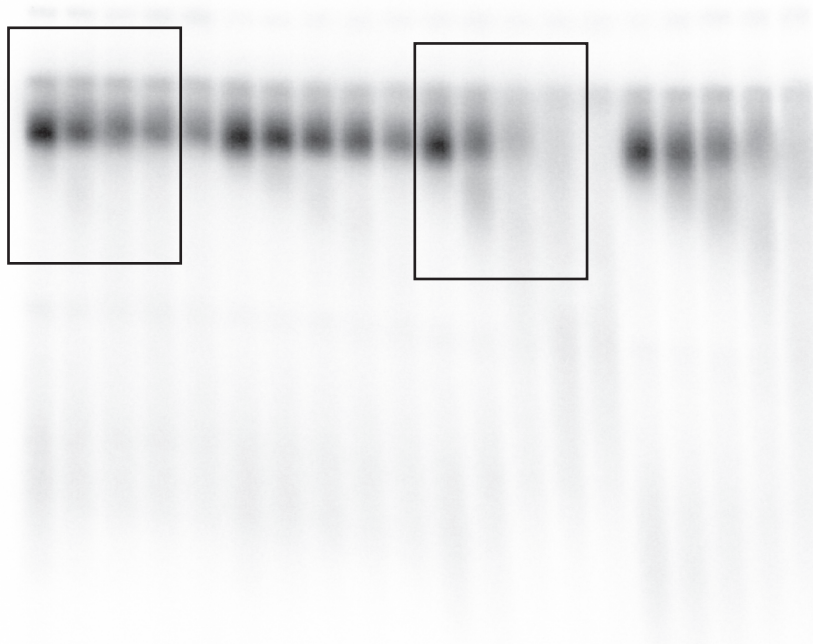

**Figure 4e**

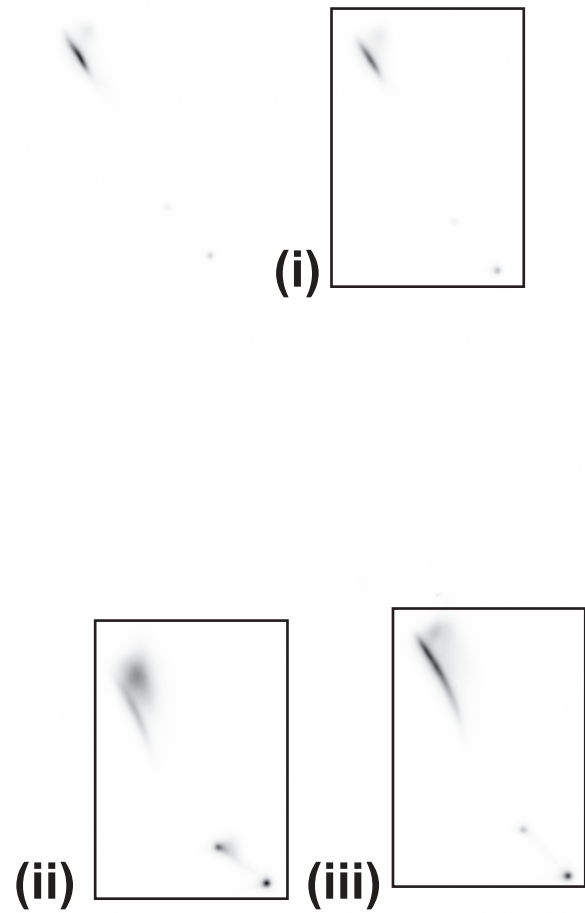

Supplement: NIHMS1848970-supplement-1848970_SD_Fig_4_unprocessed_gels.pdf [file NIHMS1848970-supplement-1848970_SD_Fig_4_unprocessed_gels.pdf]

**Figure 5b**

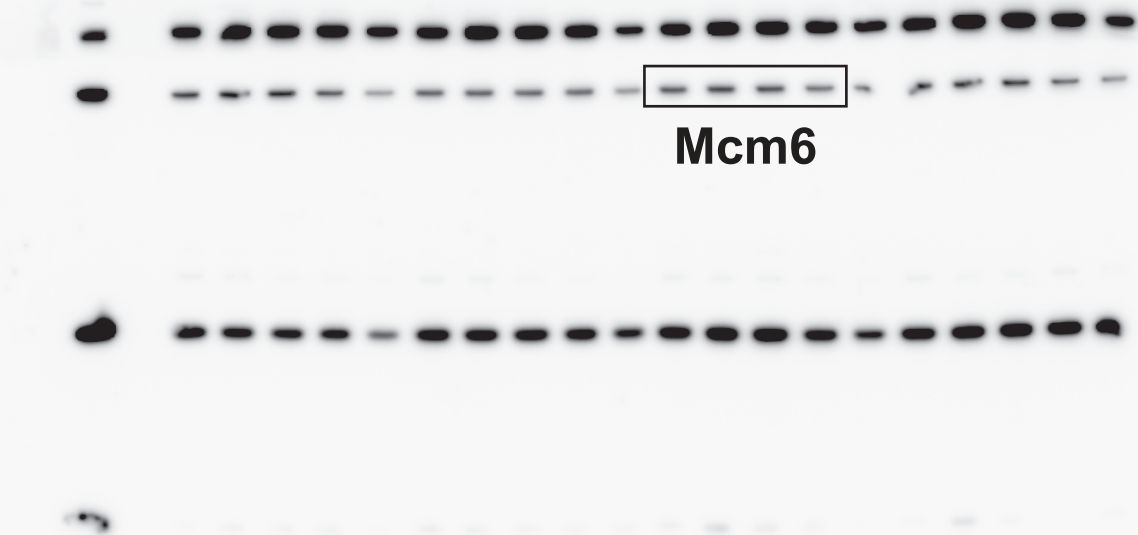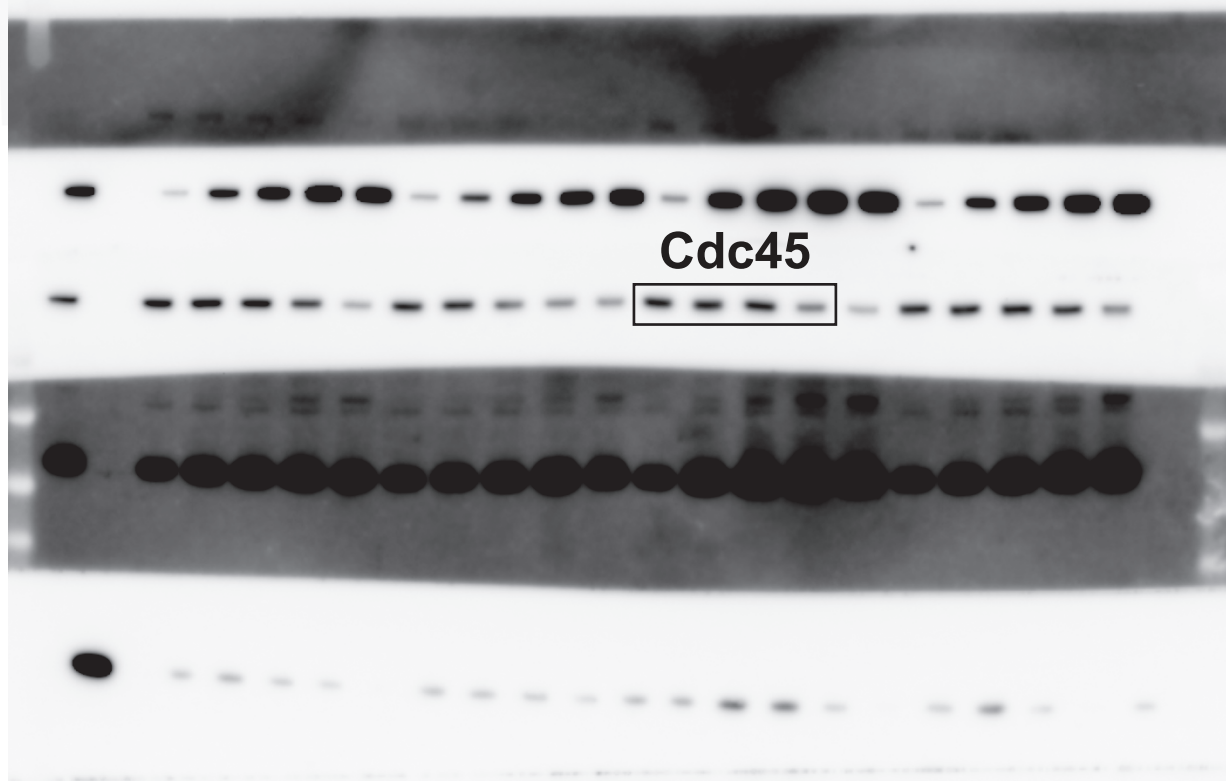

**Figure 5b**

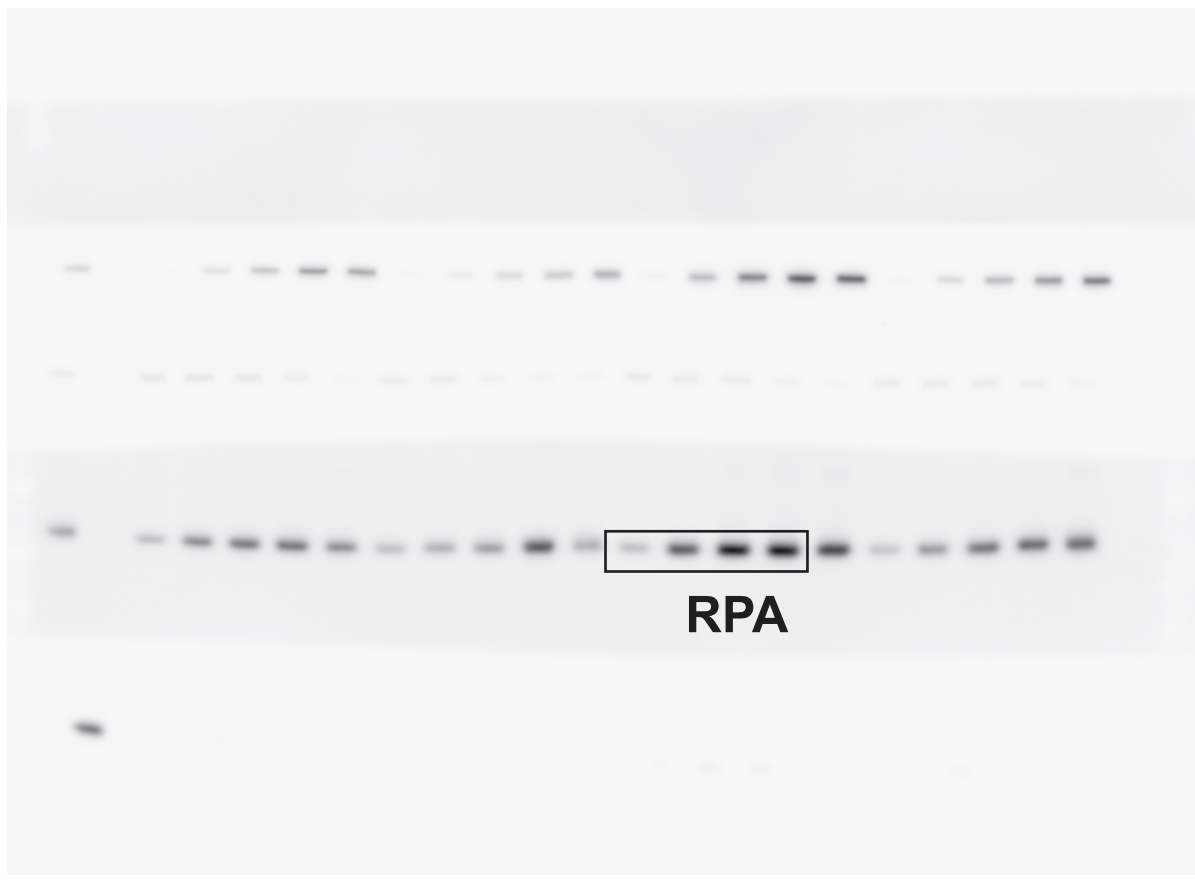

**Figure 5e**

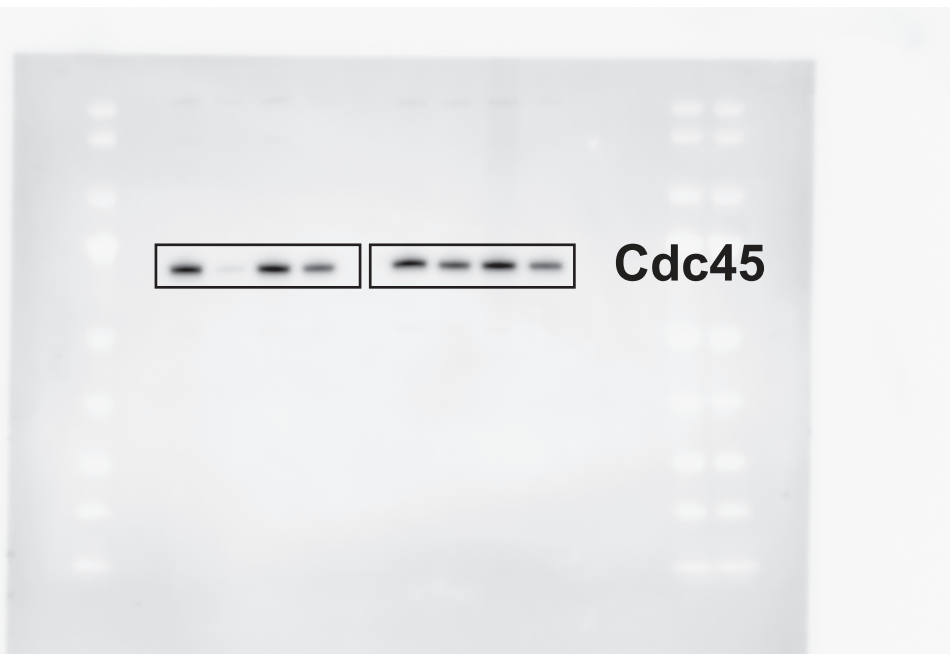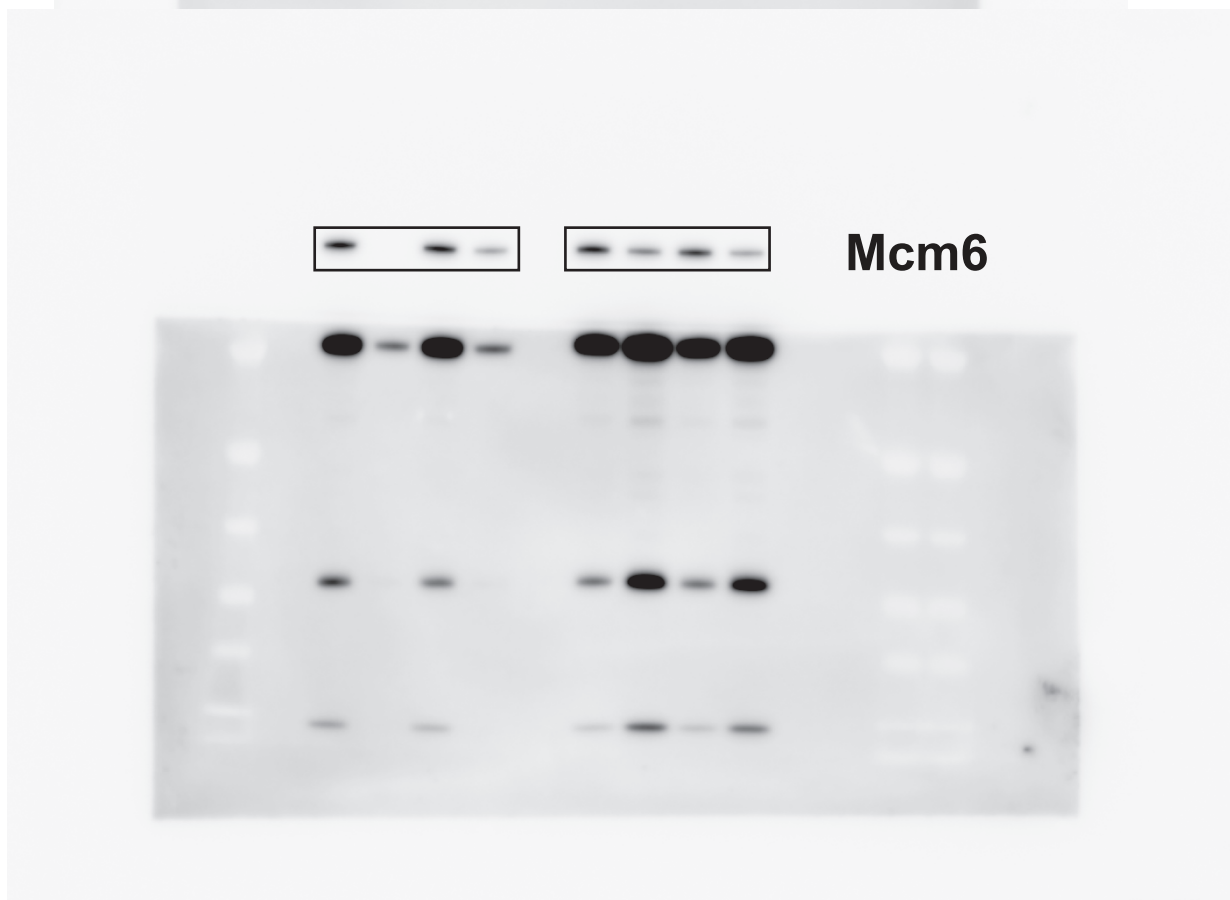

**Figure 5e**

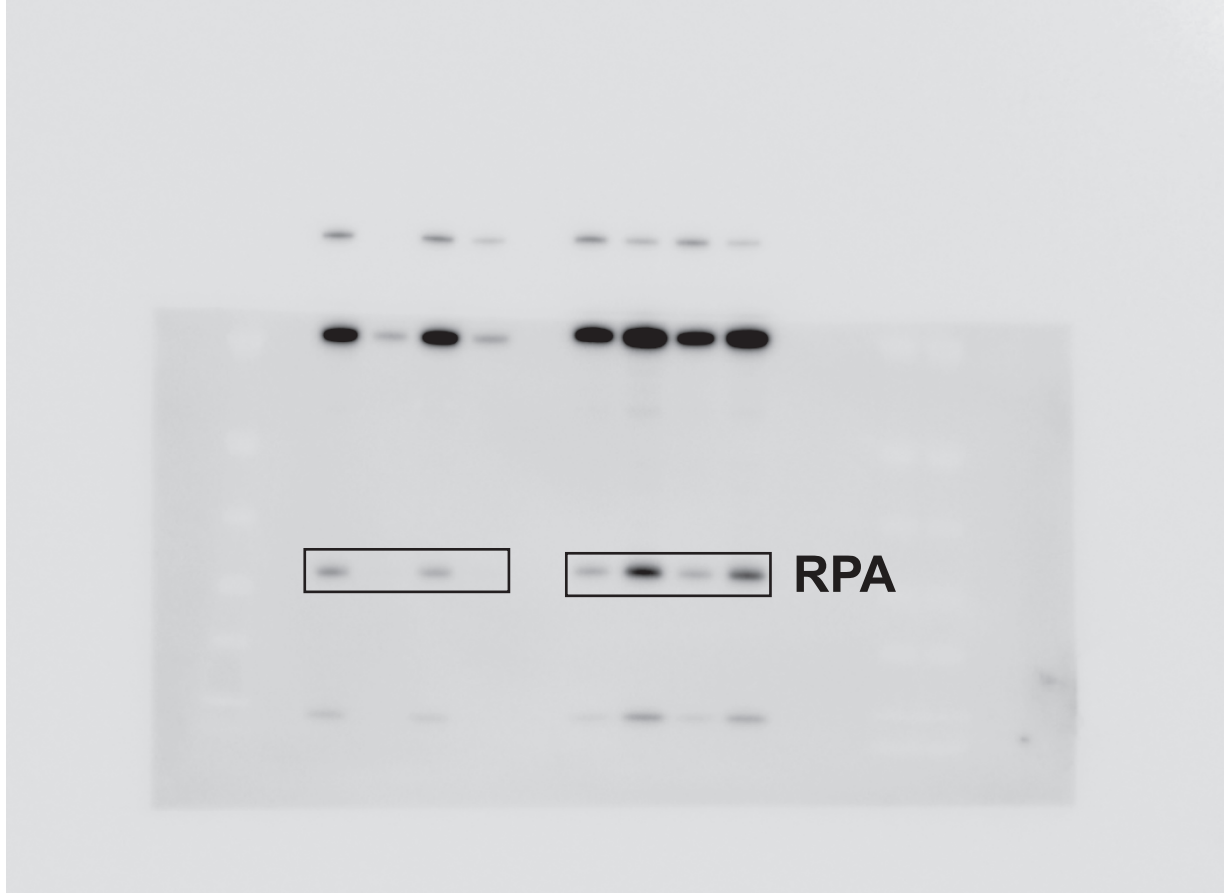

**Figure 5g**

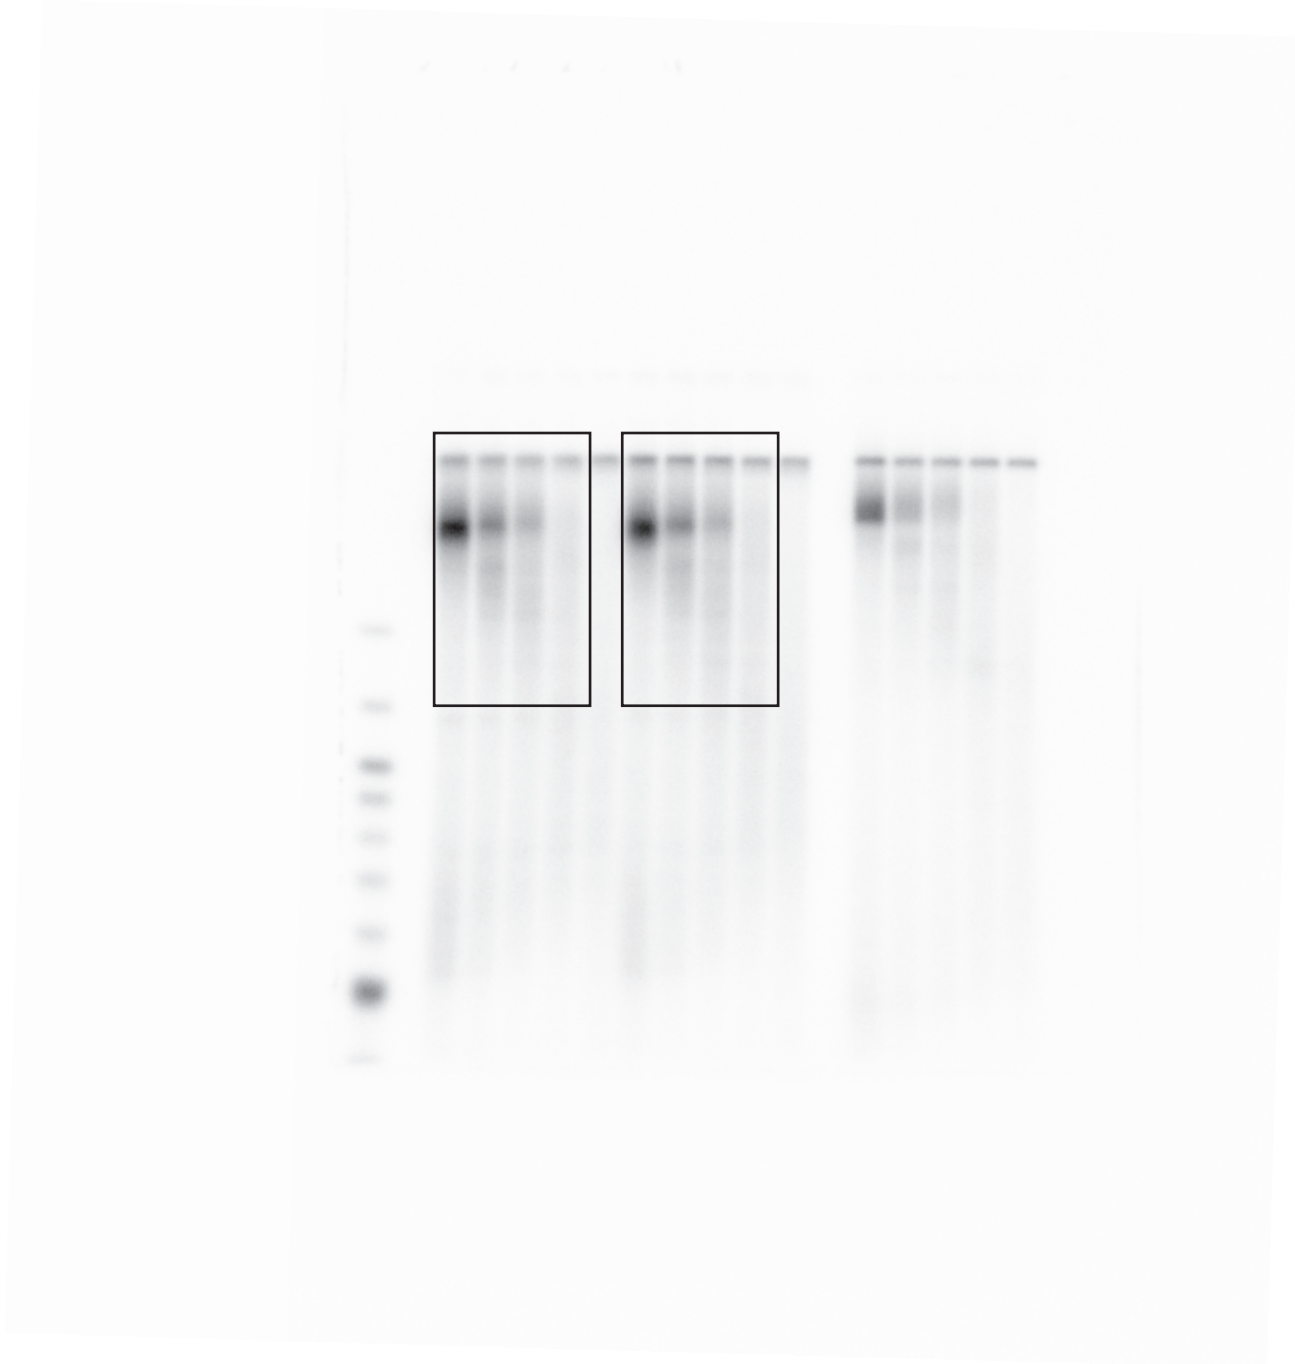

Supplement: NIHMS1848970-supplement-1848970_SD_Fig_5_unprocessed_gels.pdf [file NIHMS1848970-supplement-1848970_SD_Fig_5_unprocessed_gels.pdf]

**Figure 6b**

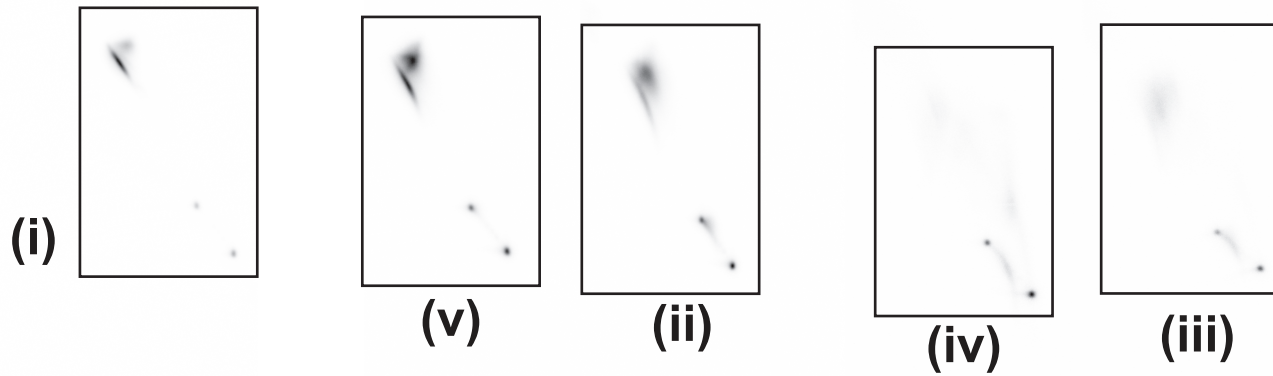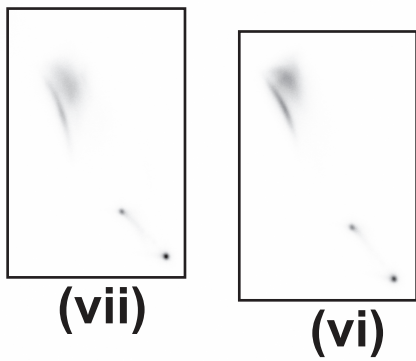

**Figure 6f**

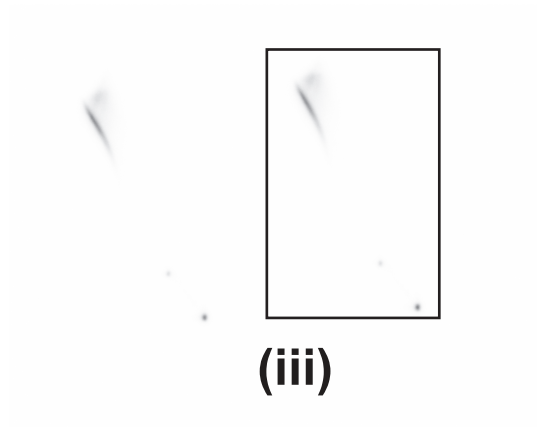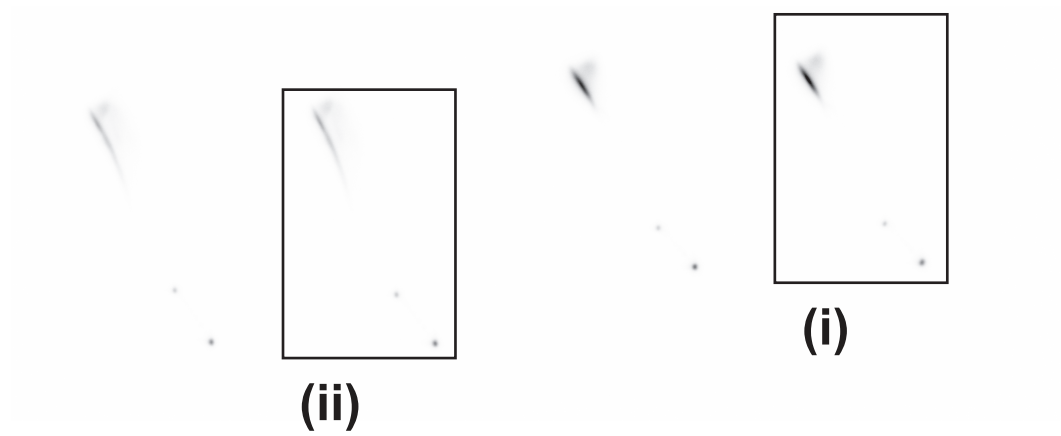

Supplement: NIHMS1848970-supplement-1848970_SD_Fig_6_unprocessed_gels.pdf [file NIHMS1848970-supplement-1848970_SD_Fig_6_unprocessed_gels.pdf]
